# Supplementary material for: Minimally Invasive Surfactant Therapy (MIST) vs intubate-surfactant-extubate (InSurE) technique, in a Peruvian Neonatal Intensive Care Unit (NICU)
Source: Research Square preprint supplement (doi:10.21203/rs.3.rs-4289599/v1), 2024-05-15
Supplement: Supplementary file 1 [file 53b56c3633f5812228b7bea2.docx]

| **Table 3**. Respiratory Outcomes | | | | |
| --- | --- | --- | --- | --- |
|  | **Birth weigth <1500g** | | **Birth weigth >1500g** | |
|  | **MIST (n:19)** | **InSurE (n:23)** | **MIST (n:24)** | **InSurE (n:25)** |
| Need for >1 dose of surfactant | 7/23 (36.8) | 6/23 (26.0) | 3/24 (12.5) | 4/25 (16) |
| Duration of oxygen therapy (days): Mean (SD) | 22.68 (17.81) | 23.52 (16.63) | 7.4 (4.7) | 7.8 (3.7) |
| Duration of invasive mechanical ventilation: Mean (SD) | 8.5 (8.8) | 11.5 (12.4) | 3.9 (3.2) | 3.5 (3.1) |
| Duration of any type of ventilation: Mean (SD) | 16.8 (15.9) | 17.91 (13.86) | 5.1 (3.9) | 5.6 (3.3) |
| Hospital stay (days): Mean (SD) | 36.68 (24.08) | 45.91 (28.13) | 21.6 (12.37) | 22.6 (10.45) |
