# Supplementary material for: Minimally Invasive Surfactant Therapy (MIST) vs intubate-surfactant-extubate (InSurE) technique, in a Peruvian Neonatal Intensive Care Unit (NICU)
Source: Research Square preprint supplement (doi:10.21203/rs.3.rs-4289599/v1), 2024-05-15
Supplement: Supplementary file 2 [file 9ef0de6f72c969188401e576.docx]

| **Table 1.** Demographic characteristics | | | | |
| --- | --- | --- | --- | --- |
|  | Birth weigth <1500g | | Birth weigth >1500g | |
|  | InSurE (n:23) | MIST (n:19) | InSurE (n:25) | MIST (n:24) |
| Gestational age (weeks): Mean (SD) | 29 (1.4) | 28.5 (1.9) | 32.84 (1.7) | 33.0 (1.8) |
| Birth weight (g): Mean (SD) | 1222.8 (248.6) | 1124.4 (148.0) | 2045.44 (368.8) | 2097.6 (381.2) |
| Male sex (%) | 15/23 (65.2) | 11/19 (57.9) | 17/25 (68) | 15 (62.5) |
| Apgar score (5 minutes): Mean (SD) | 8.5 (0.7) | 8.1 (0.7) | 8.4 (0.7) | 8.4 (0.8) |
| Cesarean section (%) | 21/23 (91.3) | 16/19 (84.2) | 19/25 (76) | 23/24 (95.8) |
| Maternal hypertension (%) | 5/23 (21.7) | 5/19 (26.3) | 2/25 (8) | 5/24 (20.8) |
| Maternal diabetes (%) | 0 | 0 | 2/25 (8) | 0 |
| PROM > 18 hours (%) | 2/23 (8.7) | 6/19 (31.6) | 3/25 (12) | 4/24 (16.7) |
| Chorioamnionitis (%) | 2/23 (8.7) | 0 | 0 | 3/24 (12.5) |
| Prenatal care (<4 check-ups) (%) | 17/23 (73.9) | 15/19 (78.9) | 18/25 (72) | 18/24 (75) |
| Complete antenatal steroids (%) | 10/23 (43.5) | 8/19 (42.1) | 2/25 (8) | 3/24 (12.5) |
| Incomplete antenatal steroids (%) | 5/23 (21.7) | 7/19 (36.8) | 7/25 (28) | 9/24 (37.5) |
| No antenatal steroids (%) | 8/23 (34.7) | 4/19 (21) | 16/25 (64) | 12/24 (50) |
| Time interval from birth to surfactant | 18/23 (78.3) | 13/19 (68.4) | 11/25 (44) | 4/24 (16.7) |
| administration < 2 hours (%) |
| Time interval from birth to surfactant | 5/23 (21.7) | 6/19 (31.6) | 13/25 (52) | 19/24 (79.2) |
| administration 2-24 hours (%) |
