# Supplementary material for: Minimally Invasive Surfactant Therapy (MIST) vs intubate-surfactant-extubate (InSurE) technique, in a Peruvian Neonatal Intensive Care Unit (NICU)
Source: Research Square preprint supplement (doi:10.21203/rs.3.rs-4289599/v1), 2024-05-15
Supplement: Supplementary file 3 [file b03689e70da1f814a5860485.docx]

| Table 2. Primary Outcomes | | | | |
| --- | --- | --- | --- | --- |
|  | Birth weigth <1500g | | Birth weigth >1500g | |
|  | MIST (n:19) | InSurE (n:23) | MIST (n:24) | InSurE (n:25) |
| Need for invasive mechanical ventilation | 14/19 (73.6) | 16/23 (69.6) | 7/24 (29.2) | 7/25 (28) |
|  | RR 1.06 (CI 95% 0.72-1.55) p= 0.77 | | RR 1.04 (CI 95% 0.43-2.52) p= 0.93 | |
| Bronchopulmonary dysplasia | 1/12 (8.3) | 1/16 (6.3) | 0 | 0 |
|  | RR 1.16 (CI95% 0.27-4.96) p= 0.84 | |  | |
| Mortality | 7/19 (36.8) | 7/23 (30.4) | 0 | 0 |
|  | RR 1.21 (CI95% 0.52-2.84) p=0.66 | |  |  |
| Bronchopulmonary dysplasia and/or mortality | 8/19 (42.1) | 8/23 (34.8) |  |  |
|  | RR 1.11 (CI95% 0.61-1.99) p=0.75 | |  |  |
